# Supplementary material for: Neural mechanism of acute stress regulation by trace aminergic signalling in the lateral habenula in male mice
Source: PubMed Central journal article supplement (PMC10140019; doi:10.1038/s41467-023-38180-7), 2023-04-27
Supplement: 41467_2023_38180_MOESM1_ESM.pdf [file 41467_2023_38180_MOESM1_ESM.pdf]

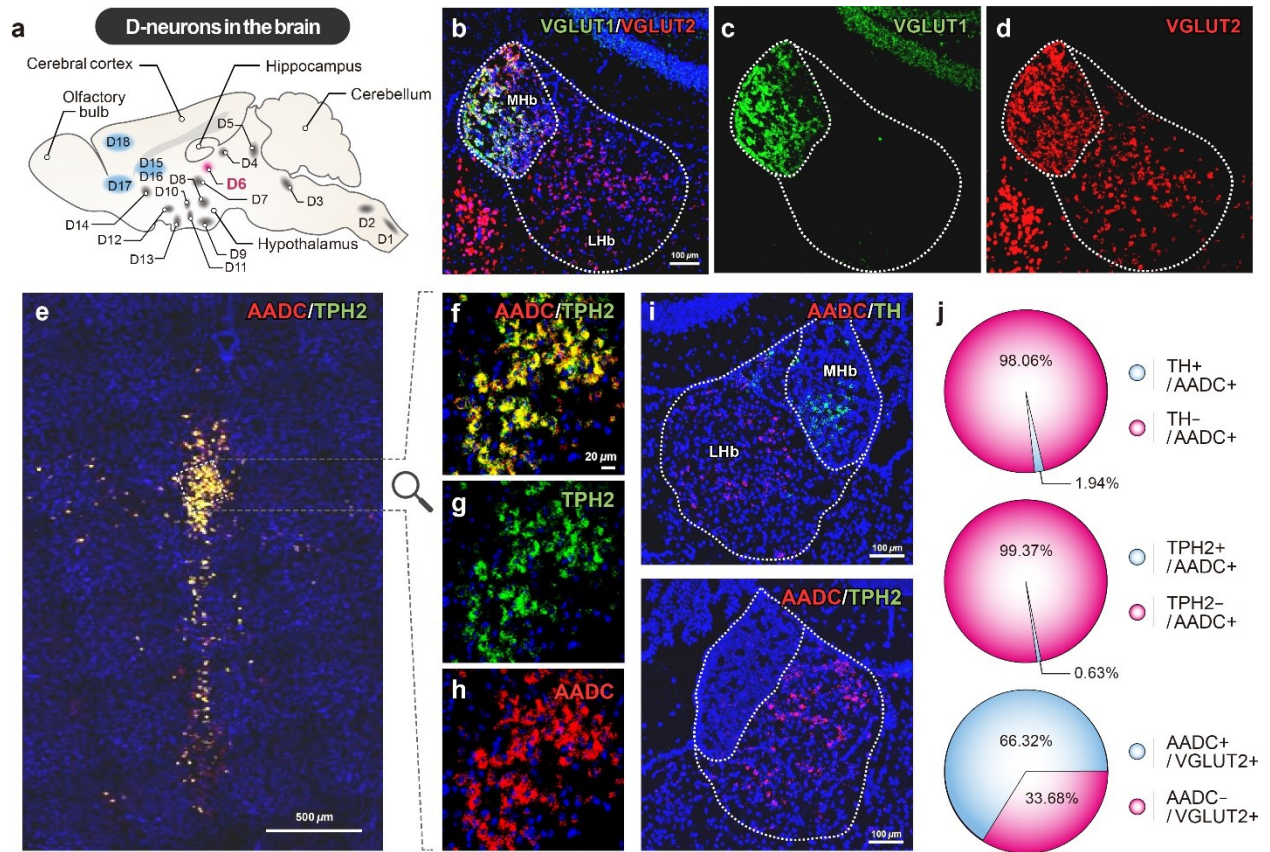

1

2 **Supplementary Fig. 1: Validation and characterisation of LHb D-neurons.** a, Distribution of D-neurons in the  
 3 brain<sup>64</sup>. D1, spinal cord; D2, nucleus tractus solitarius; D3, parabrachial complex (rostral medulla and pons); D4,  
 4 midbrain (nuclei associated with the posterior commissure); D5, pretectal nuclei; D6, lateral habenula; D7, paracentral  
 5 nucleus of the dorsal thalamus; D8, nucleus premammillaris of the hypothalamus; D9, arcuate nucleus; D10, zona  
 6 incerta; D11, lateral hypothalamic region; D12, dorsomedial hypothalamic nucleus; D13, suprachiasmatic nucleus;  
 7 D14, bed nucleus of the stria terminalis; D15, striatum; D16, nucleus accumbens; D17, basal forebrain; D18, cerebral  
 8 cortex. **b, c**, Expression of VGLUT1 in the MHb. **b, d**, Expression of VGLUT2 in the MHb and the LHb. **e-h**,  
 9 Expression of AADC/TPH2 in the raphe nucleus (**e**), and magnified images of the region of interest (dashed square)  
 10 (**f, g, h**). **i**, Expression of AADC, TH and TPH2 in the habenula. **j**, Pie chart of the percentages of TH-expressing  
 11 AADC-positive cells ( $n = 4$  independent mice), TPH2-expressing AADC-positive cells ( $n = 4$  independent mice) and  
 12 AADC-expressing VGLUT2-positive cells ( $n = 3$  independent mice) in the LHb by FISH. Source data are provided  
 13 as a Source Data file.

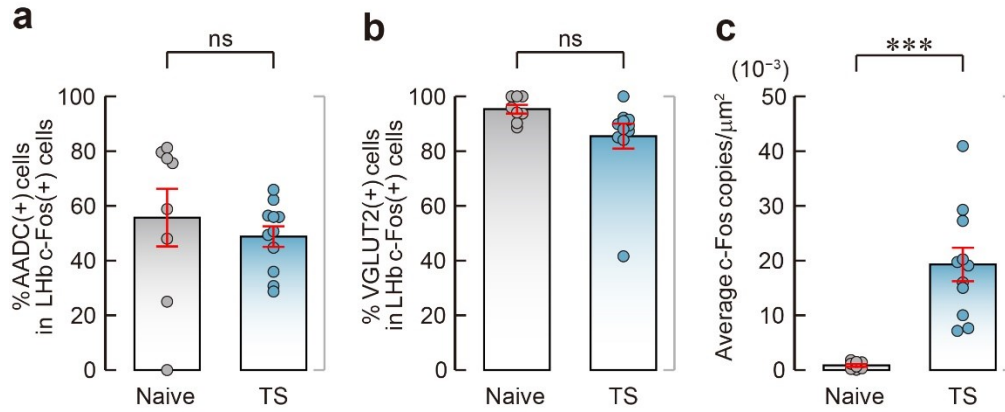

14

15 **Supplementary Fig. 2: Analysis of activated neurons in the LHb after exposure to tail suspension stress. a,**  
 16 Percentage of AADC-expressing cells among c-Fos-positive cells by FISH cells ( $n = 8$  independent Naïve mice and  
 17  $n = 11$  independent TS mice). **b,** Percentage of VGLUT2-expressing c-Fos-positive cells by FISH cells ( $n = 8$   
 18 independent Naïve mice and  $n = 11$  independent TS mice). **c,** Mean total number of c-Fos copies per  $\mu\text{m}^2$  in the LHb  
 19 cells ( $n = 8$  independent Naïve mice and  $n = 11$  independent TS mice). Unless otherwise stated, statistical comparisons  
 20 were performed using a two-tailed unpaired t test. \*\*\* $p < 0.001$ . Data are presented as the mean values  $\pm$  s.e.m. Source  
 21 data are provided as a Source Data file.

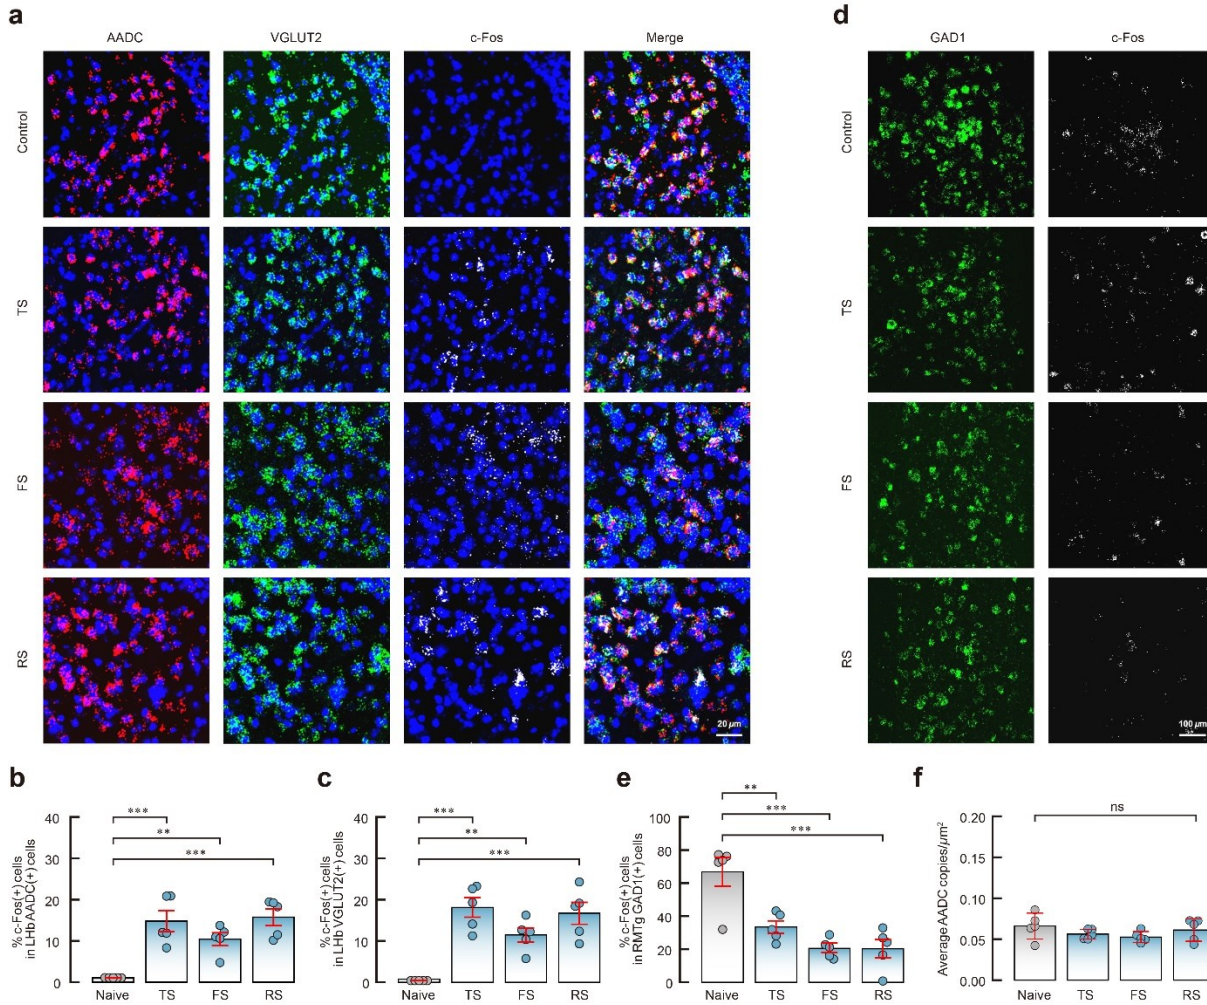

22

23 **Supplementary Fig. 3: Analysis of the activity of the LHb and the RMTg after various acute stressors. a, d,**  
 24 **Representative images of expression of AADC/VGLUT2/c-Fos in the LHb (a) and GAD1/c-Fos in the RMTg (d) by**  
 25 **FISH. b, c, e, Percentage of c-Fos-expressing AADC-positive neurons (b) and c-Fos-expressing VGLUT2-positive**  
 26 **neurons in the LHb (c) and c-Fos-expressing GAD1-positive neurons in the RMTg (e) by FISH. f, Average total**  
 27 **number of AADC copies per  $\mu\text{m}^2$  in the LHb.  $n = 5$  independent Naïve mice,  $n = 5$  independent TS mice,  $n = 5$**   
 28 **independent FS mice and  $n = 5$  independent RS mice. Unless otherwise stated, statistical comparisons were performed**  
 29 **using a one-way ANOVA.  $**p < 0.01$  and  $***p < 0.001$ . FS, forced swimming; RS, restraint stress. Data are presented**  
 30 **as the mean values  $\pm$  s.e.m. Source data are provided as a Source Data file.**

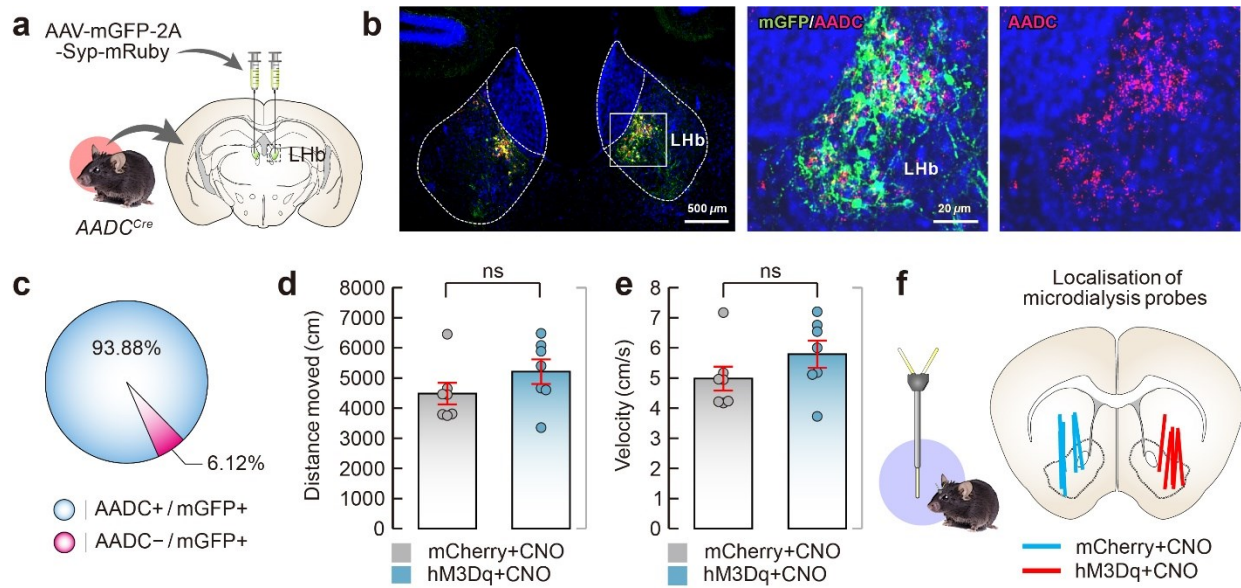

31

32 **Supplementary Fig. 4: Validation of *AADC*<sup>Cre</sup> transgenic mice, effects of chemogenetic stimulation of LHb D-**  
 33 **neurons on locomotor activity, and the localisation of microdialysis probes.** **a**, Schematic for the validation of  
 34 *AADC*<sup>Cre</sup> mice using the Cre-dependent virus (a recombinant AAV expressing mGFP/synaptophysin-mRuby). **b**,  
 35 Representative images of mGFP and AADC mRNA expression in the LHb. Magnified images of the region of interest  
 36 (white square) are shown to the right of the main image. **c**, Pie chart depicting the proportion of AADC-expressing  
 37 cells among mGFP-positive cells ( $n = 3$  independent mGFP mice). **d**, **e**, Distance moved (**d**) and velocity (**e**) of mice  
 38 in the OFT after chemogenetic stimulation of LHb D-neurons ( $n = 7$  independent mCherry mice and  $n = 7$  independent  
 39 hM3Dq mice), statistical comparisons were performed using a two-tailed unpaired t test. **f**, Schematic of the  
 40 microdialysis probe placement in the NAc used in the experiment reported in Fig. 2*i, j*. Data are presented as the mean  
 41 values  $\pm$  s.e.m. Source data are provided as a Source Data file.

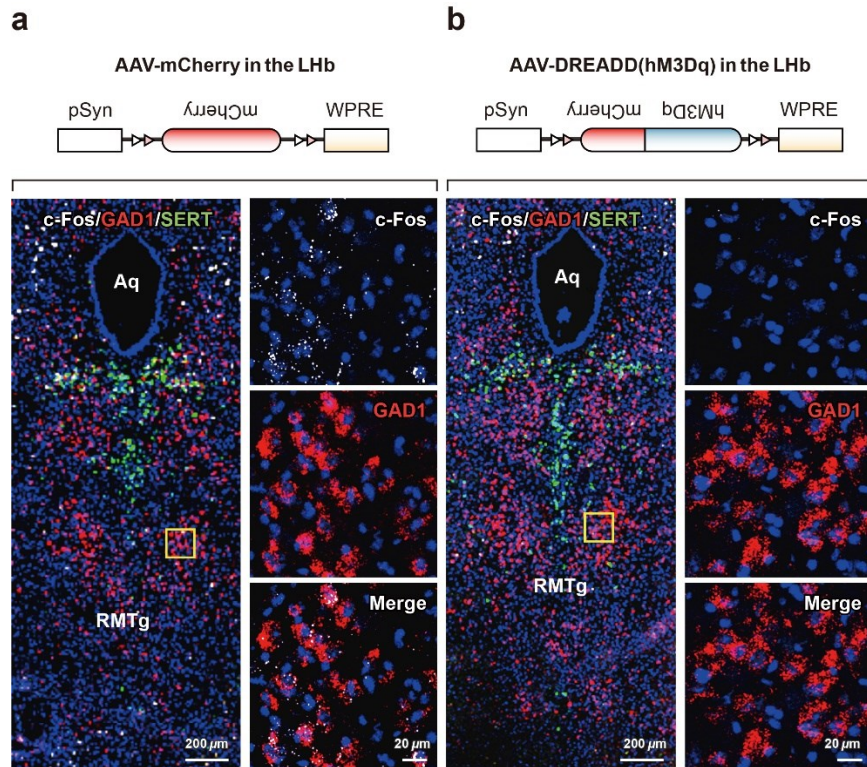

42

43 **Supplementary Fig. 5: The effect of chemogenetic stimulation of LHb D-neurons on c-Fos expression in RMTg**  
 44 **GABAergic neurons.** **a, b,** mCherry-expressing (**a**) and hM3Dq-expressing (**b**) LHb D-neurons were  
 45 chemogenetically stimulated, and c-Fos, GAD1 and serotonin transporter (SERT) expression were measured in the  
 46 RMTg by FISH. Magnified images of the regions of interest (yellow squares) are shown to the right of the main  
 47 images. Aq, aqueduct.

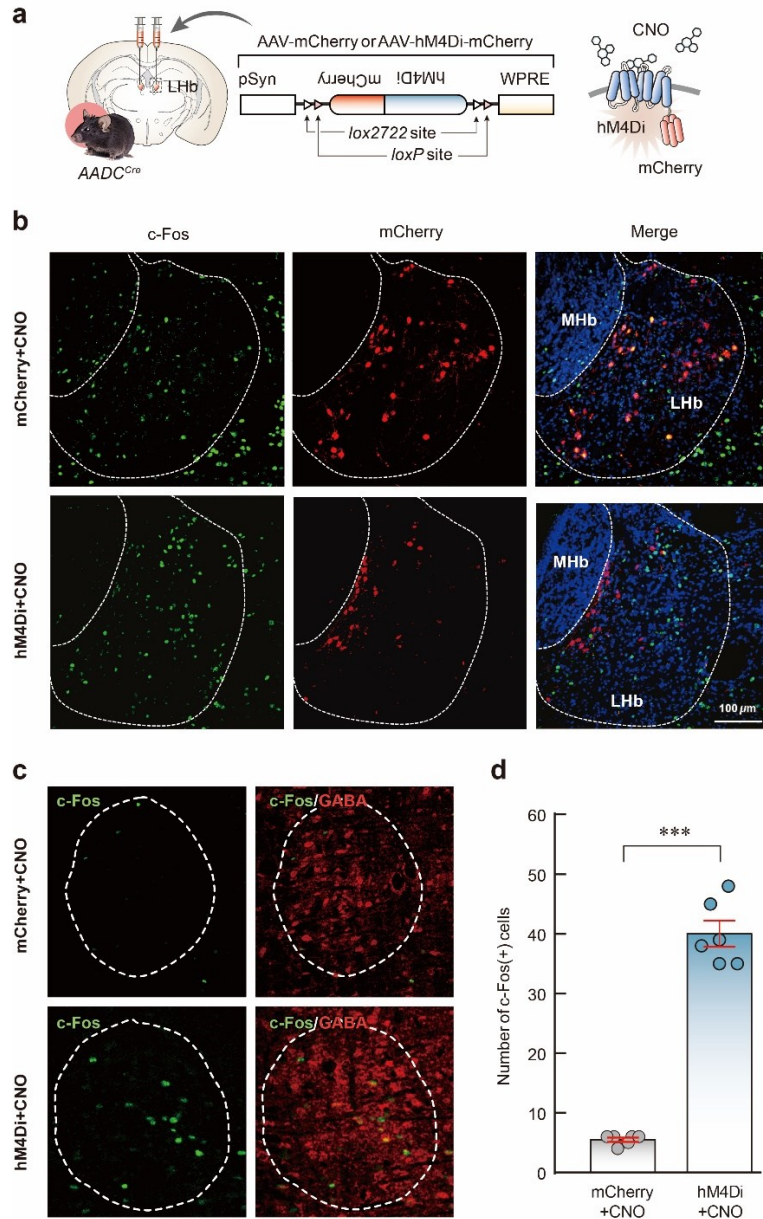

48

49 **Supplementary Fig. 6: Chemogenetic inhibition of LHb D-neurons during tail suspension stress increases c-Fos**  
 50 **expression in the RMTg. a**, Schematic of AAV vectors for Cre-dependent hM4Di or mCherry expression **b**,  
 51 Representative images of viral infection and c-Fos expression in the LHb. **c**, Expression of c-Fos/GABA in the RMTg  
 52 by immunohistochemistry. **d**, The number of c-Fos-expressing neurons in the RMTg by immunohistochemistry ( $n =$   
 53 6 independent mCherry mice and  $n = 6$  independent hM4Di mice), statistical comparisons were performed using a  
 54 two-tailed unpaired t test. \*\*\* $p < 0.001$ . Data are presented as the mean values  $\pm$  s.e.m. Source data are provided as a  
 55 Source Data file.

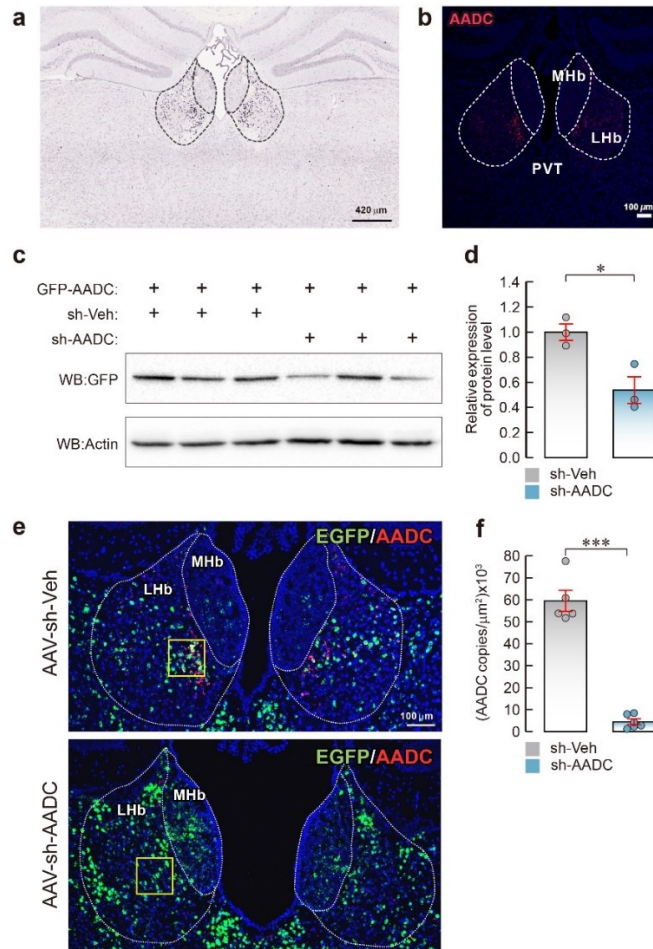

56

57 **Supplementary Fig. 7: Validation of AADC knockdown in the LHb.** **a, b**, Expression of AADC mRNA in the LHb  
 58 via the Allen Brain Atlas (<https://mouse.brain-map.org/>) (**a**) and FISH analysis (**b**). PVT, paraventricular nucleus of  
 59 the thalamus. **c, d**, In vitro validation of AADC knockdown in HEK293T cells expressing GFP-AADC (pDEST-  
 60 CMV-C-EGFP) and shVeh or AAV-shAADC plasmid. After 72 h of expression, the western blot (WB) was imaged  
 61 (**c**) and the band intensity of exogenous AADC protein levels was normalised to that of actin ( $n = 3$  cell lysates from  
 62 sh-Veh HEK293T cells and  $n = 3$  cell lysates from sh-AADC HEK293T cells) (**d**). **e, f**, In vivo validation of AADC  
 63 knockdown in LHb cells expressing AAV-shVeh or AAV-shAADC for 3 weeks. Representative FISH images of  
 64 EGFP and AADC in the LHb (**e**). Magnified images of the regions of interest (yellow squares) are shown in Fig. 3e.  
 65 The average number of AADC mRNA copies per  $\mu\text{m}^2$  was multiplied by  $10^3$  ( $n = 5$  independent sh-Veh mice and  $n =$   
 66 6 independent sh-AADC mice) (**f**). Unless otherwise stated, statistical comparisons were performed using a two-tailed  
 67 unpaired t test.  $*p < 0.05$  and  $***p < 0.001$ . Data are presented as the mean values  $\pm$  s.e.m. Source data are provided  
 68 as a Source Data file.

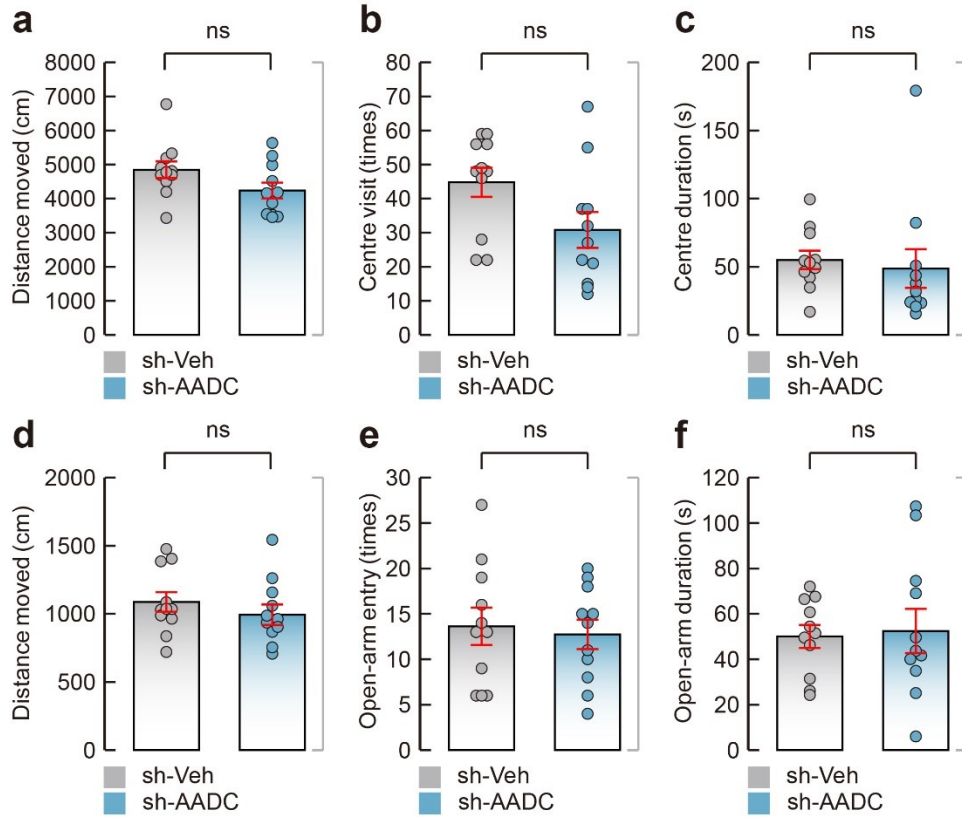

69

70 **Supplementary Fig. 8: AADC knockdown in the LHb and tests of locomotion and anxiety outcomes. a-c, OFT**  
 71 **results: distance moved (a), number of centre visits (b) and duration spent in the centre (c). d-f, EZM results: distance**  
 72 **moved (d), number of entries into open quadrants (e) and duration spent in open quadrants (f).  $n = 11$  independent sh-**  
 73 **Veh mice and  $n = 11$  independent sh-AADC mice. Statistical comparisons were performed using a two-tailed unpaired**  
 74 **t test. Data are presented as the mean values  $\pm$  s.e.m. Source data are provided as a Source Data file.**



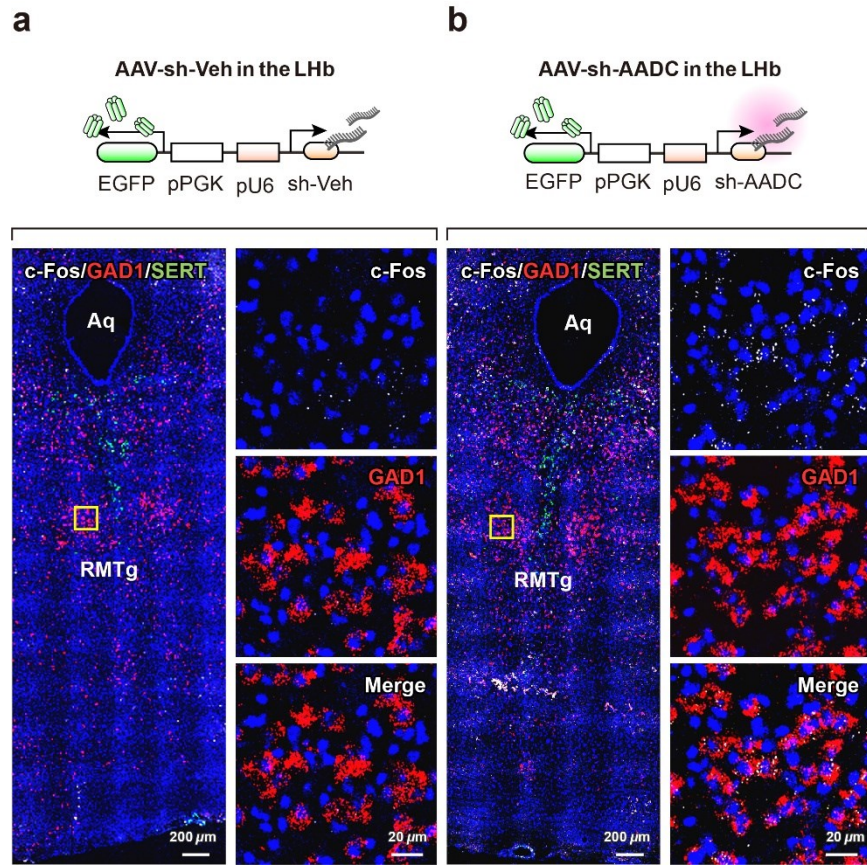

75

76 **Supplementary Fig. 9: The effect AADC knockdown of LHB D-neurons on c-Fos expression in RMTg**  
 77 **GABAergic neurons. a, b, Vehicle (a) and AADC (b) were knocked down in the LHB, and c-Fos and GAD1**  
 78 **expression were measured in the RMTg by FISH. Magnified images of the regions of interest (yellow squares) are**  
 79 **shown to the right of the main images. Aq, aqueduct.**

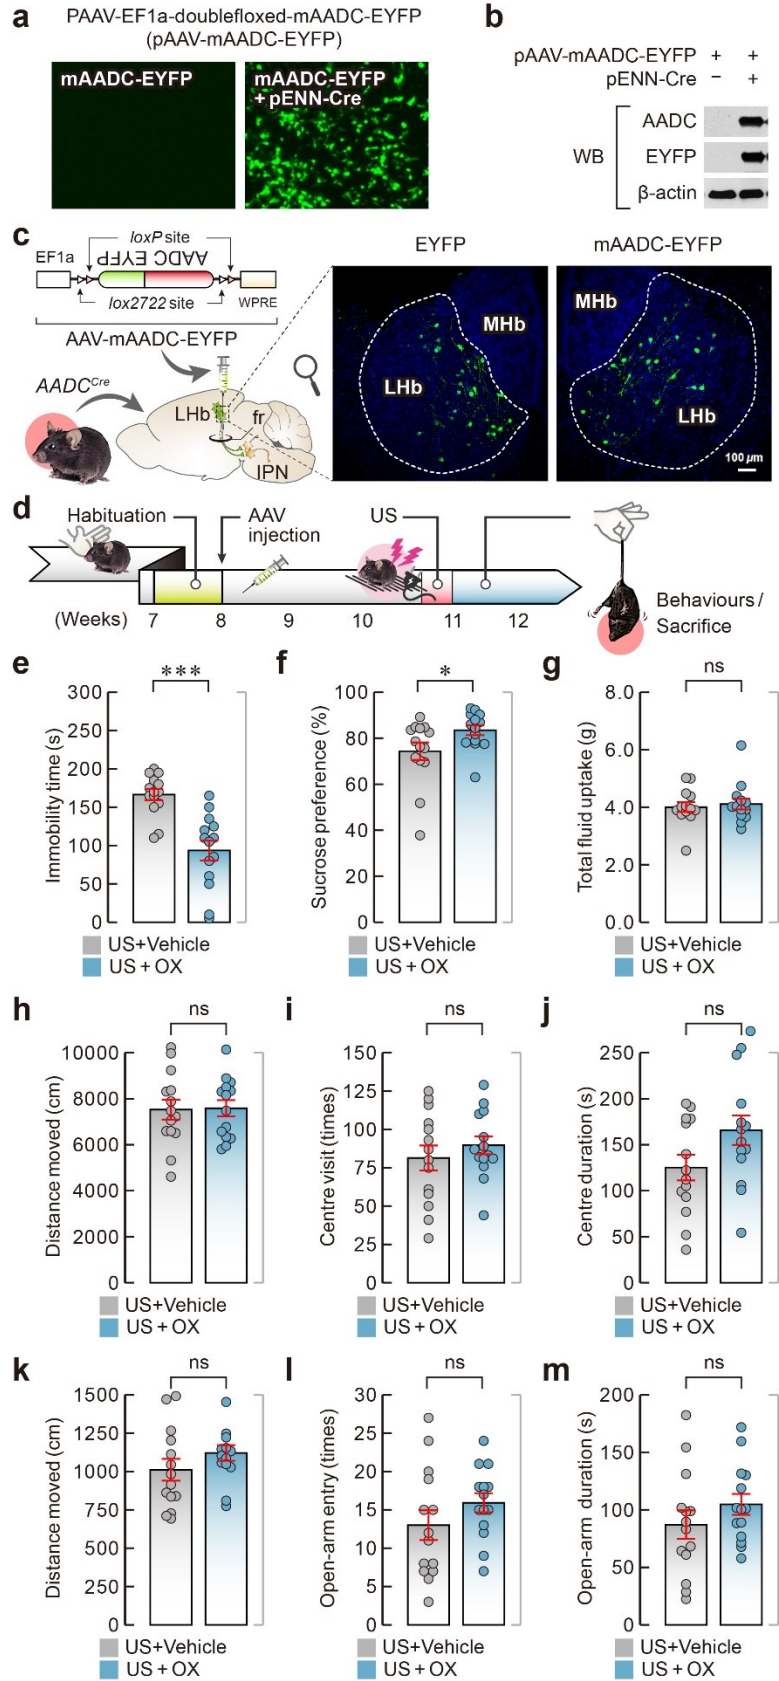

81 **Supplementary Fig. 10: Depressive-like behaviours induced by US with AADC expression in the LHb.** **a**, In  
82 vitro validation of AADC overexpression in HEK293T cells expressing mAADC-EYFP and Cre recombinase. **b**,  
83 Western blot (WB) analysis of exogenous AADC and EYFP protein levels 72 h after expression. **c**, Schematic of the  
84 AAV engineered to overexpress AADC and its location of injection (left). In vivo validation of AADC overexpression  
85 demonstrated by the expression of EYFP (right) by FISH. **d**, Experimental paradigm for behavioural assays. **e-g**,  
86 Effect of AADC overexpression in the LHb on immobility time in the TST (**e**) and on percentage of sucrose preference  
87 (**f**) and total fluid intake (**g**) in the SPT. **h-j**, OFT results: distance moved (**h**), number of centre visits (**i**) and duration  
88 spent in the centre (**j**). **k-m**, EZM results: distance moved (**k**), number of entries into the open quadrant (**l**) and duration  
89 spent in the open quadrant (**m**). OX, AADC overexpression.  $n = 14$  independent EYFP mice and  $n = 14$  independent  
90 mAADC mice. Statistical comparisons were performed using a two-tailed unpaired t test.  $*p < 0.05$  and  $***p < 0.001$ .  
91 Data are presented as the mean values  $\pm$  s.e.m. Source data are provided as a Source Data file.

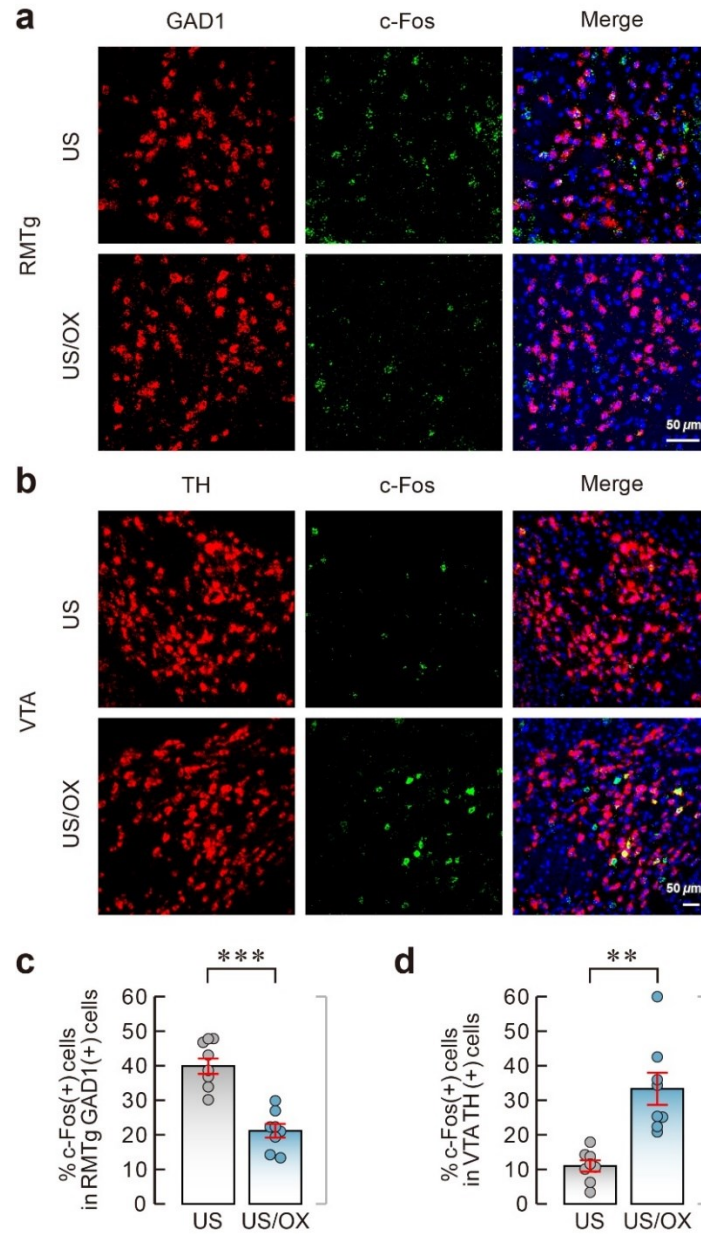

92

93 **Supplementary Fig. 11: AADC overexpression in the RMTg and VTA after US.** **a, b,** Effect of AADC  
 94 overexpression in the LHb on RMTg GABAergic and VTA dopaminergic neuronal activity. Expression of c-  
 95 Fos/GAD1 in the RMTg (**a**) and TH/c-Fos in the VTA (**b**). **c, d,** Percentage of c-Fos-expressing GAD1-positive  
 96 neurons in the RMTg (**c**) and c-Fos-expressing TH-positive neurons in the VTA (**d**).  $n = 8$  independent EYFP mice  
 97 and  $n = 8$  independent mAADC mice. Statistical comparisons were performed using a two-tailed unpaired t test.  $**p$   
 98  $< 0.01$  and  $***p < 0.001$ . Data are presented as the mean values  $\pm$  s.e.m. Source data are provided as a Source Data  
 99 file.

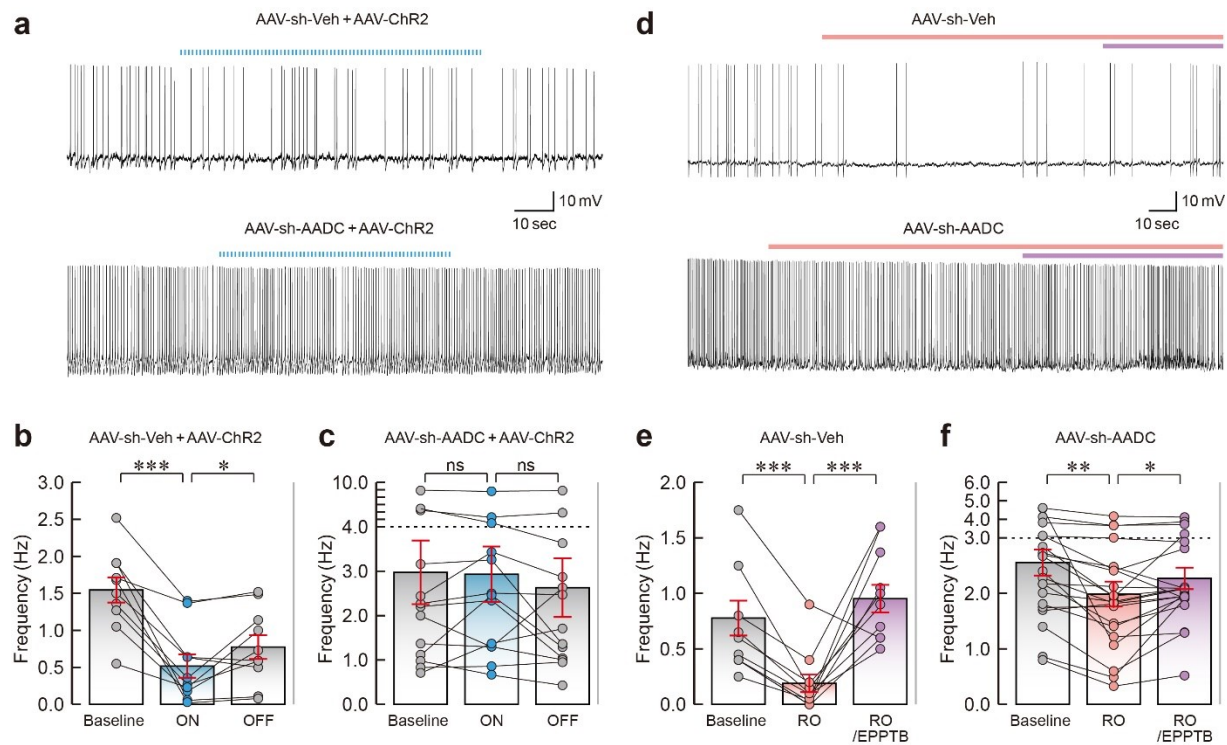

101

102 **Supplementary Fig. 12: Raw frequency data corresponding to Fig. 5. a, d.** Full traces by optogenetics for Fig. 5b  
 103 (a) and by pharmacological application for Fig. 5f (d). **b, c,** Firing frequencies of neurons in control mice ( $n = 10$  cells  
 104 from independent sh-Veh/ChR2 mice) (**b**) and AADC-knockdown mice ( $n = 13$  cells from independent sh-  
 105 AADC/ChR2 mice) (**c**) were measured in the ON and OFF states of blue-light photoactivation. **e, f,** Firing frequencies  
 106 of neurons in control mice ( $n = 11$  cells from independent sh-Veh mice) (**e**) and AADC-knockdown mice ( $n = 21$  cells  
 107 from independent sh-AADC mice) (**f**) measured after the application of RO5263397 (500 nM) or EPPTB (1  $\mu$ M).  
 108 Unless otherwise stated, statistical comparisons were performed using repeated measure one-way ANOVA followed  
 109 by contrast test.  $*p < 0.05$ ,  $**p < 0.01$  and  $***p < 0.001$ . Data are presented as the mean values  $\pm$  s.e.m. Source data  
 110 are provided as a Source Data file.

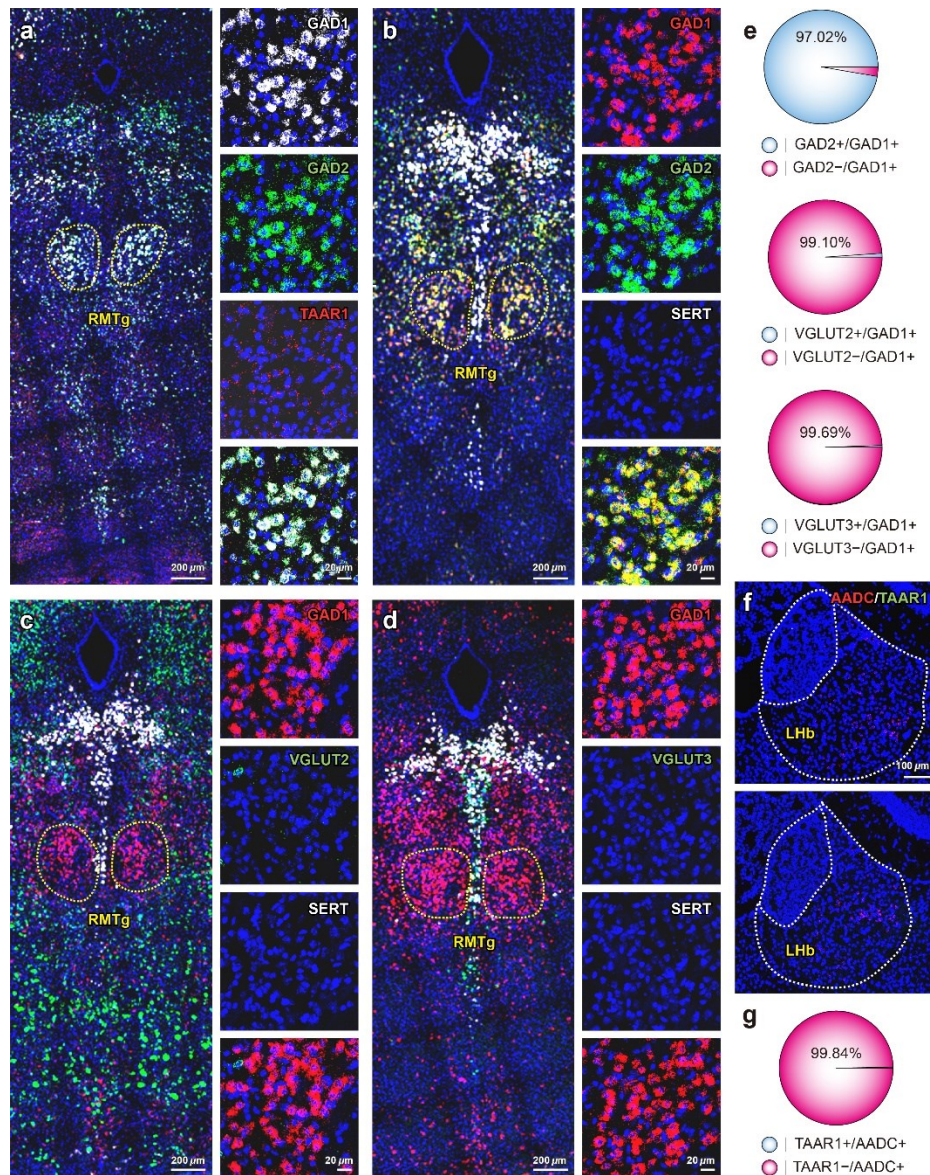

111

112 **Supplementary Fig. 13: Validation of TAAR1 mRNA expression in RMTg GABAergic neurons and Lhb D-**  
 113 **neurons. a-d**, Representative FISH images for GAD1/GAD2/TAAR1 (a), GAD1/GAD2/SERT (b),  
 114 GAD1/VGLUT2/SERT (c) and GAD1/VGLUT3/SERT (d) in the RMTg. e, Pie charts depicting the percentage of  
 115 GAD1-expressing neurons co-expressing GAD2 ( $n = 4$  independent mice), VGLUT2 ( $n = 3$  independent mice) or  
 116 VGLUT3 ( $n = 3$  independent mice). f, g, Representative images of FISH for AADC/TAAR1 (f), and a pie chart  
 117 depicting the percentage of TAAR1-expressing neurons among AADC-positive neurons ( $n = 3$  independent mice) (g).  
 118 Magnified images of the RMTg (dashed yellow circles) are shown to the right of the main images. Source data are  
 119 provided as a Source Data file.

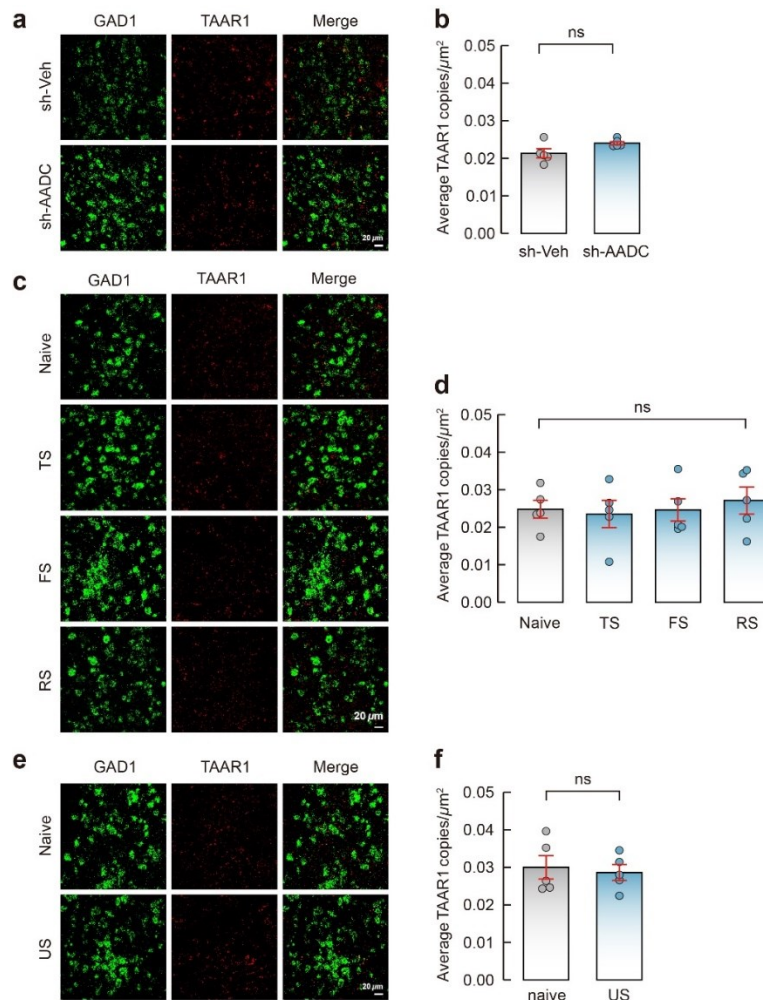

120

121 **Supplementary Fig. 14: Validation of TAAR1 mRNA expression in RMTg GABAergic neurons after AADC**  
 122 **knockdown, US or various acute stressors. a, b,** Expression of GAD1/TAAR1 in the RMTg (a) and the number of  
 123 TAAR1 mRNA copies per  $\mu\text{m}^2$  in control mice and AADC-knockdown mice (b) by FISH ( $n = 5$  independent sh-Veh  
 124 mice and  $n = 5$  independent sh-AADC mice). c, d, Expression of GAD1/TAAR1 in the RMTg (c) and the number of  
 125 TAAR1 mRNA copies per  $\mu\text{m}^2$  in naïve mice and mice treated with the acute stressors (d) by FISH ( $n = 5$  independent  
 126 Naïve mice,  $n = 5$  independent TS mice,  $n = 5$  independent FS mice and  $n = 5$  independent RS mice, statistical  
 127 comparisons were performed using a one-way ANOVA). e, f, Expression of GAD1/TAAR1 in the RMTg (e) and the  
 128 number of TAAR1 mRNA copies per  $\mu\text{m}^2$  in naïve mice and mice treated with US (f) by FISH ( $n = 5$  independent  
 129 Naïve mice and  $n = 5$  independent US mice). Unless otherwise stated, statistical comparisons were performed using a  
 130 two-tailed unpaired t test. Data are presented as the mean values  $\pm$  s.e.m. Source data are provided as a Source Data  
 131 file.

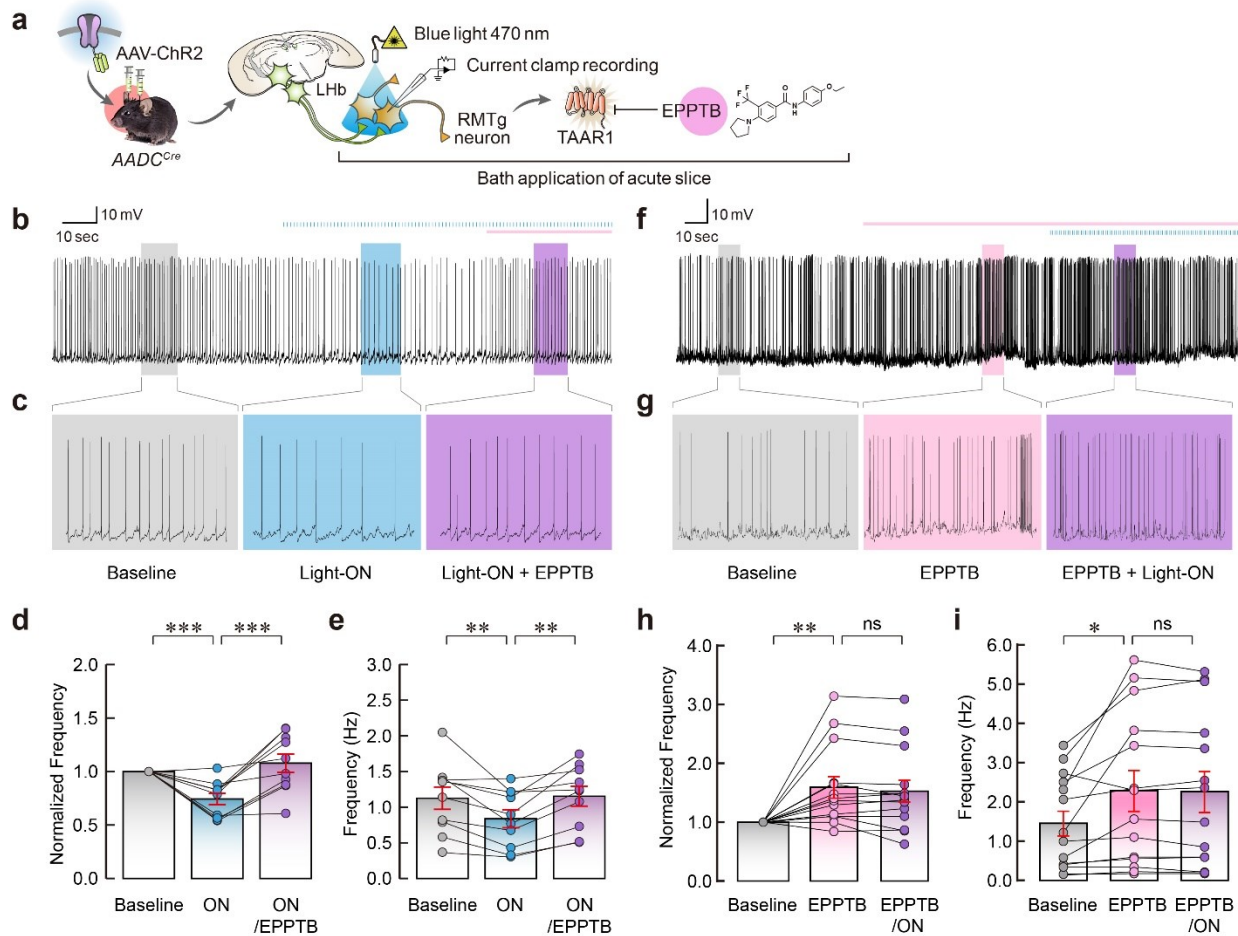

132

133 **Supplementary Fig. 15: RMTg firing frequencies by optogenetic stimulation of LHB D-neuron terminals before**

134 **or after EPPTB treatment into the RMTg. a,** Schematic of AAV injection and RMTg GABAergic neuronal firing

135 rates in response to the post- or pre-application of EPPTB during optogenetic stimulation of LHB D-neuron terminals.

136 **b, f,** Full traces acquired by whole-cell recording from RMTg GABAergic neurons. **c, g,** Representative traces

137 measured in response to the application of optogenetic stimulation or EPPTB (1  $\mu$ M). **d, e, h, i,** The firing frequency

138 was normalised to the baseline value (**d, h**) and measured after the application of optogenetic stimulation or EPPTB

139 (1  $\mu$ M) (**e, i**).  $n = 10$  cells from independent ON/EPPTB mice and  $n = 14$  cells from independent EPPTB/ON mice.

140 Statistical comparisons were performed using repeated measure one-way ANOVA followed by contrast test.  $*p <$

141  $0.05$ ,  $**p < 0.01$  and  $***p < 0.001$ . Data are presented as the mean values  $\pm$  s.e.m. Source data are provided as a

142 Source Data file.

143



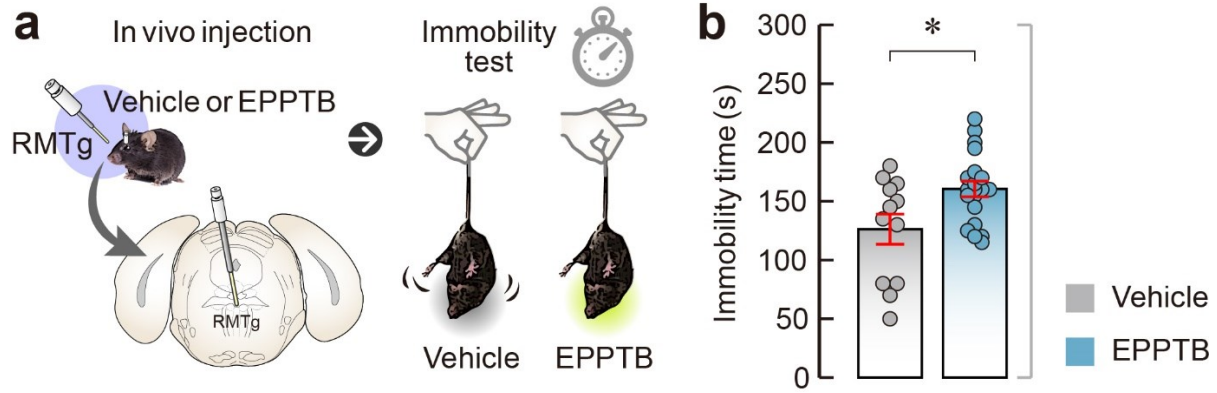

144

145 **Supplementary Fig. 16: Treatment of EPPTB into the RMTg and quantification of despair-like behaviour. a,**

146 **b,** Schematic of cannula implantation over the RMTg (**a**) and TST immobility time (**b**).  $n = 12$  independent Vehicle

147 mice and  $n = 20$  independent EPPTB mice. Statistical comparisons were performed using a two-tailed unpaired t test.

148  $*p < 0.05$ . Data are presented as the mean values  $\pm$  s.e.m. Source data are provided as a Source Data file.

**a sh-Veh**

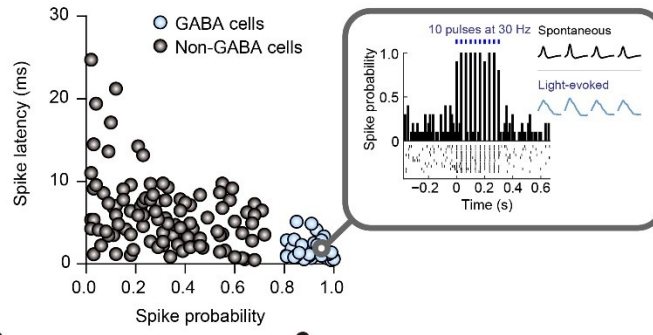

**b**

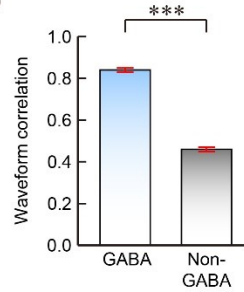

**c**

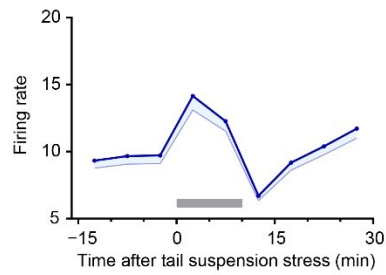

**d sh-AADC**

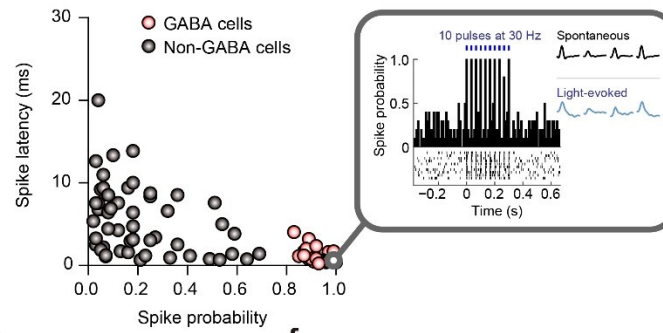

**e**

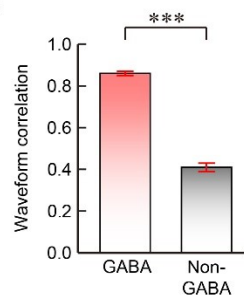

**f**

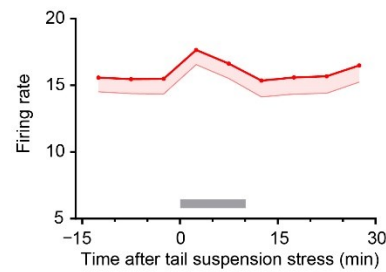

**g**

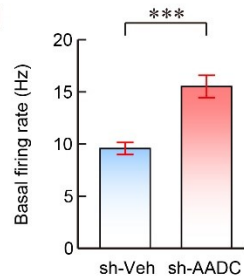

150 **Supplementary Fig. 17: In vivo recording of RMTg GABAergic neurons before and after exposure to tail**  
151 **suspension stress. a, d**, Characteristics of light-evoked responses in control (**a**) and AADC-knockdown (**d**) mice.  
152 Peristimulus time histograms (10-ms bins) constructed during the presentation of 10 trains of 10 blue-light pulses  
153 (each pulse 5-ms width at 30 Hz; inter-train interval of 60 sec). Spike probability and latency in response to 100 pulses  
154 calculated from all RMTg neurons recorded in each group. The boxed histograms show firing patterns of two  
155 representative GABAergic neurons. **b, e**, Correlations between spontaneous and light-evoked waveforms of RMTg  
156 neurons in control ( $n = 34$  independent GABA cells and  $n = 103$  independent non-GABA cells) (**b**) and AADC-  
157 knockdown ( $n = 29$  independent GABA cells and  $n = 53$  independent non-GABA cells) (**e**) mice. **c, f**, Average firing  
158 rates of GABAergic neurons (5-min bins) before, during and after tail suspension in control (**c**) and AADC-knockdown  
159 (**f**) mice. **g**, Comparison of basal firing rates measured during a 15-min period prior to tail suspension between control  
160 and AADC-knockdown mice ( $n = 34$  GABA cells from independent sh-Veh mice and  $n = 29$  GABA cells from  
161 independent sh-AADC mice). Unless otherwise stated, statistical comparisons were performed using a two-tailed  
162 unpaired t test. \*\*\* $p < 0.001$ . Data are presented as the mean values  $\pm$  s.e.m. Source data are provided as a Source  
163 Data file.

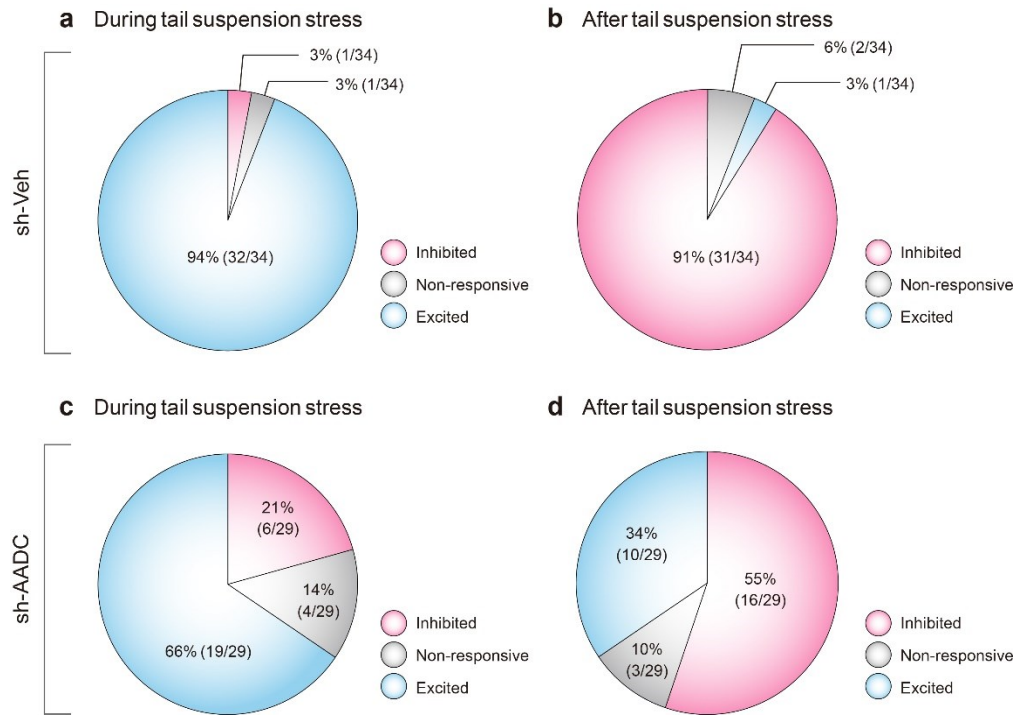

164

165 **Supplementary Fig. 18: Pie charts showing the percentage of RMTg GABAergic neurons during and after tail**  
 166 **suspension stress. a-d,** Proportions of GABAergic neurons showing excited, inhibited and no responses during tail  
 167 suspension (first 5 min; **a** and **c**) and after the stress (first 5 min; **b** and **d**) in control and AADC-knockdown mice,  
 168 respectively.

169

170 **Supplementary Table 1. RNAscope FISH probes used in this work.**

| Gene name | Accession #    | Target region | Cat. #    | Manufacturer                          |
|-----------|----------------|---------------|-----------|---------------------------------------|
| AADC      | NM_001190448.1 | 297 – 1726    | 464871    | ACD<br>(Advanced cell<br>Diagnostics) |
|           |                | 297 – 1726    | 464871-C3 |                                       |
|           |                | 835 – 1779    | 318681-C2 |                                       |
|           |                | 835 – 1779    | 318681-C3 |                                       |
| VGLUT1    | NM_182993.2    | 464 – 1415    | 416631-C3 |                                       |
| VGLUT2    | NM_080853.3    | 1986 – 2998   | 319171-C2 |                                       |
| VGLUT3    | NM_182959.3    | 781-1695      | 431261    |                                       |
| TPH2      | NM_173391.3    | 1640 – 2622   | 318691-C2 |                                       |
| TH        | NM_009377.1    | 483 – 1603    | 317621-C2 |                                       |
| TAAR1     | NM_053205.1    | 7– 980        | 318421    |                                       |
|           |                | 7 – 980       | 318421-C2 |                                       |
| FOS       | NM_010234.2    | 407 – 1427    | 316921-C3 |                                       |
| GAD1      | NM_0080774     | 62 – 3113     | 400951-C2 |                                       |
|           |                | 62 – 3113     | 400951-C3 |                                       |
| GAD2      | NM_008078.2    | 552 – 1506    | 439371-C3 |                                       |
| EGFP      | U55763.1       | 628 – 1352    | 400281-C3 |                                       |
| SERT      | NM_010484.2    | 452 – 1378    | 315851-C2 |                                       |

171

172 **Supplementary Table 2. Detailed statistical information**

| Figure      | Sample Size                                  | Statistical test                             | Statistics                             |
|-------------|----------------------------------------------|----------------------------------------------|----------------------------------------|
| Fig. 1d     | n = 12 brain slices from 3 mice              | % of VGLUT2-expressing AADC (+) cells        | 90.6999 %                              |
| Fig. 1g     | n = 8, 11 mice including 16, 22 brain slices | Two-tailed unpaired <i>t</i> -test           | t = -9.694<br>df = 13.570<br>p = 0.000 |
| Fig. 1h     | n = 8, 11 mice including 16, 22 brain slices | Two-tailed unpaired <i>t</i> -test           | t = -10.226<br>df = 17<br>p = 0.000    |
| Fig. 1i     | n = 8, 11 mice including 16, 22 brain slices | Two-tailed unpaired <i>t</i> -test           | t = -9.936<br>df = 11.731<br>p = 0.000 |
| Fig. 1k (L) | n = 8, 11 mice including 16, 22 brain slices | Two-tailed unpaired <i>t</i> -test           | t = -3.274<br>df = 17<br>p = 0.004     |
| Fig. 1k (R) | n = 8, 11 mice including 16, 22 brain slices | Two-tailed unpaired <i>t</i> -test           | t = -3.178<br>df = 17<br>p = 0.006     |
| Fig. 2b     | n = 14, 15 mice                              | Two-tailed unpaired <i>t</i> -test           | t = 3.366<br>df = 27<br>p = 0.002      |
| Fig. 2d     | n = 5, 6 mice including 27, 30 brain slices  | Two-tailed unpaired <i>t</i> -test           | t = -7.821<br>df = 9<br>p = 0.000      |
| Fig. 2f     | n = 5, 6 mice including 8, 12 brain slices   | Two-tailed unpaired <i>t</i> -test           | t = -5.466<br>df = 9<br>p = 0.000      |
| Fig. 2h     | n = 4, 5 mice including 11, 14 brain slices  | Two-tailed unpaired <i>t</i> -test           | t = 7.842<br>df = 7<br>p = 0.000       |
| Fig. 2j     | n = 7, 5 mice                                | Two-tailed Mann-Whitney U-test (Base 60 min) | U = 15.000<br>p = 0.755                |
|             |                                              | Two-tailed Mann-Whitney U-test (Base 40 min) | U = 10.000<br>p = 0.268                |
|             |                                              | Two-tailed Mann-Whitney U-test (Base 20 min) | U = 10.000<br>p = 0.268                |
|             |                                              | Two-tailed Mann-Whitney U-test (CNO 20 min)  | U = 0.000<br>p = 0.003                 |
|             |                                              | Two-tailed Mann-Whitney U-test (CNO 40 min)  | U = 5.000<br>p = 0.048                 |
|             |                                              | Two-tailed Mann-Whitney U-test (CNO 60 min)  | U = 14.000<br>p = 0.639                |
|             |                                              | Two-tailed Mann-Whitney U-test (CNO 80 min)  | U = 6.000<br>p = 0.073                 |
|             |                                              | Two-tailed Mann-Whitney U-test (CNO 100 min) | U = 3.000<br>p = 0.042                 |
|             |                                              | Two-tailed Mann-Whitney U-test (CNO 120 min) | U = 6.000<br>p = 0.164                 |
| Fig. 3a     | n = 4, 4 rats                                | Two-tailed Mann-Whitney U-test               | U = 0.000<br>p = 0.029                 |
| Fig. 3b     | n = 11, 11 mice                              | Two-tailed unpaired <i>t</i> -test           | t = 4.032<br>df = 20                   |

|             |                                             |                                                                                           |                                          |
|-------------|---------------------------------------------|-------------------------------------------------------------------------------------------|------------------------------------------|
|             |                                             |                                                                                           | $p = 0.001$                              |
| Fig. 3e     | n = 5, 6 mice including 39, 35 brain slices | Two-tailed unpaired <i>t</i> -test                                                        | t = 12.091<br>df = 9<br>$p = 0.000$      |
| Fig. 3g     | n = 11, 11 mice                             | Two-tailed unpaired <i>t</i> -test (0 week)                                               | t = -0.179<br>df = 20<br>$p = 0.860$     |
|             |                                             | Two-tailed unpaired <i>t</i> -test (1st week)                                             | t = 0.082<br>df = 20<br>$p = 0.936$      |
|             |                                             | Two-tailed unpaired <i>t</i> -test (2nd week)                                             | t = 1.821<br>df = 20<br>$p = 0.084$      |
|             |                                             | Two-tailed unpaired <i>t</i> -test (3rd week)                                             | t = 3.212<br>df = 20<br>$p = 0.004$      |
|             |                                             | Two-tailed unpaired <i>t</i> -test (4th week)                                             | t = 3.299<br>df = 20<br>$p = 0.004$      |
| Fig. 3h     | n = 18, 18 mice                             | Two-tailed unpaired <i>t</i> -test                                                        | t = -4.556<br>df = 34<br>$p = 0.000$     |
| Fig. 3i     | n = 16, 16 mice                             | Two-tailed unpaired <i>t</i> -test                                                        | t = 5.067<br>df = 18.904<br>$p = 0.000$  |
| Fig. 3j     | n = 16, 16 mice                             | Two-tailed unpaired <i>t</i> -test                                                        | t = 0.920<br>df = 30<br>$p = 0.365$      |
| Fig. 3l     | n = 7, 7 mice including 14, 14 brain slices | Two-tailed unpaired <i>t</i> -test                                                        | t = 6.181<br>df = 12<br>$p = 0.000$      |
| Fig. 3n     | n = 7, 6 mice including 15, 14 brain slices | Two-tailed unpaired <i>t</i> -test                                                        | t = -5.421<br>df = 11<br>$p = 0.000$     |
| Fig. 4e     | n = 9, 9 cells from 3, 3 mice               | Two-tailed unpaired <i>t</i> -test                                                        | t = -8.442<br>df = 8.033<br>$p = 0.000$  |
| Fig. 4g (M) | n = 9, 14 cells from 3, 4 mice              | Two-tailed unpaired <i>t</i> -test                                                        | t = -2.991<br>df = 17.562<br>$p = 0.008$ |
| Fig. 4g (R) | n = 10, 14 cells from 3, 4 mice             | Two-tailed unpaired <i>t</i> -test                                                        | t = -2.613<br>df = 22<br>$p = 0.011$     |
| Fig. 5b (L) | n = 10 cells from 4 mice                    | Repeated measure One-way ANOVA followed by contrast test (Between Baseline and Light ON)  | F = 79.301<br>$p = 0.000$                |
|             |                                             | Repeated measure One-way ANOVA followed by contrast test (Between Light ON and Light OFF) | F = 3.823<br>$p = 0.082$                 |
| Fig. 5b (R) | n = 13 cells from 4 mice                    | Repeated measure One-way ANOVA followed by contrast test (Between Baseline and Light ON)  | F = 0.883<br>$p = 0.366$                 |
|             |                                             | Repeated measure One-way ANOVA followed by contrast test (Between Light ON and Light OFF) | F = 1.115<br>$p = 0.312$                 |

|                           |                                              |                                                                                           |                                        |
|---------------------------|----------------------------------------------|-------------------------------------------------------------------------------------------|----------------------------------------|
| Fig. 5d                   | n = 6 brain slices from 3 mice               | % of TAAR1-expressing GAD1 (+) cells                                                      | 98.4799 %                              |
| Fig. 5f(L)                | n = 11 cells from 5 mice                     | Repeated measure One-way ANOVA followed by contrast test (Between Baseline and RO5263397) | F = 217.693<br>p = 0.000               |
|                           |                                              | Repeated measure One-way ANOVA followed by contrast test (Between RO5263397 and EPPTB)    | F = 10.006<br>p = 0.010                |
| Fig. 5f(R)                | n = 21 cells from 8 mice                     | Repeated measure One-way ANOVA followed by contrast test (Between Baseline and RO5263397) | F = 22.443<br>p = 0.000                |
|                           |                                              | Repeated measure One-way ANOVA followed by contrast test (Between RO5263397 and EPPTB)    | F = 4.944<br>p = 0.038                 |
| Fig. 5h                   | n = 7, 10 mice                               | Two-tailed unpaired <i>t</i> -test                                                        | t = 3.039<br>df = 15<br>p = 0.008      |
| Fig. 6e                   | n = 34 cells from 2 mice                     | Repeated measure One-way ANOVA followed by contrast test (Between Baseline and 0-5)       | F = 89.934<br>p = 0.000                |
|                           |                                              | Repeated measure One-way ANOVA followed by contrast test (Between 0-5 and 10-15)          | F = 95.231<br>p = 0.000                |
|                           |                                              | Repeated measure One-way ANOVA followed by contrast test (Between Baseline and 10-15)     | F = 58.673<br>p = 0.000                |
| Fig. 6h                   | n = 29 cells from 2 mice                     | Repeated measure One-way ANOVA followed by contrast test (Between Baseline and 0-5)       | F = 17.896<br>p = 0.000                |
|                           |                                              | Repeated measure One-way ANOVA followed by contrast test (Between 0-5 and 10-15)          | F = 27.729<br>p = 0.000                |
|                           |                                              | Repeated measure One-way ANOVA followed by contrast test (Between Baseline and 10-15)     | F = 0.740<br>p = 0.397                 |
| Supplementary Fig. 1j (L) | n = 4 mice including 4 brain slices          | % of TH-expressing AADC (+) cells in the LHb                                              | 1.94 %                                 |
| Supplementary Fig. 1j (M) | n = 4 mice including 4 brain slices          | % of TPH2-expressing AADC (+) cells in the LHb                                            | 0.6334 %                               |
| Supplementary Fig. 1j (R) | n = 3 mice including 3 brain slices          | % of AADC-expressing VGLUT2 (+) cells in the LHb                                          | 66.3169 %                              |
| Supplementary Fig. 2a     | n = 8, 11 mice including 16, 22 brain slices | Two-tailed unpaired <i>t</i> -test                                                        | t = 0.620<br>df = 8.795<br>p = 0.551   |
| Supplementary Fig. 2b     | n = 8, 11 mice including 16, 22 brain slices | Two-tailed unpaired <i>t</i> -test                                                        | t = 1.773<br>df = 17<br>p = 0.094      |
| Supplementary Fig. 2c     | n = 8, 11 mice including 16, 22 brain slices | Two-tailed unpaired <i>t</i> -test                                                        | t = -6.007<br>df = 10.138<br>p = 0.000 |



|                          |                                                           |                                                              |                                                                                                                                             |
|--------------------------|-----------------------------------------------------------|--------------------------------------------------------------|---------------------------------------------------------------------------------------------------------------------------------------------|
| Supplementary Fig. 3b    | n = 5, 5, 5, 5 mice including 18, 20, 20, 18 brain slices | One-way ANOVA                                                | F = 13.794<br><i>p</i> = 0.000<br>Tukey HSD<br>Naïve vs TS <i>p</i> = 0.000<br>Naïve vs FS <i>p</i> = 0.010<br>Naïve vs RS <i>p</i> = 0.000 |
| Supplementary Fig. 3c    | n = 5, 5, 5, 5 mice including 18, 20, 20, 18 brain slices | One-way ANOVA                                                | F = 15.909<br><i>p</i> = 0.000<br>Tukey HSD<br>Naïve vs TS <i>p</i> = 0.000<br>Naïve vs FS <i>p</i> = 0.007<br>Naïve vs RS <i>p</i> = 0.000 |
| Supplementary Fig. 3e    | n = 5, 5, 5, 5 mice including 10, 10, 10, 10 brain slices | One-way ANOVA                                                | F = 14.999<br><i>p</i> = 0.000<br>Tukey HSD<br>Naïve vs TS <i>p</i> = 0.004<br>Naïve vs FS <i>p</i> = 0.000<br>Naïve vs RS <i>p</i> = 0.000 |
| Supplementary Fig. 3f(L) | n = 5, 5, 5, 5 mice including 18, 19, 20, 18 brain slices | One-way ANOVA                                                | F = 1.314<br><i>p</i> = 0.304<br>Tukey HSD<br>Naïve vs TS <i>p</i> = 0.538<br>Naïve vs FS <i>p</i> = 0.287<br>Naïve vs RS <i>p</i> = 0.912  |
| Supplementary Fig. 4c    | n = 3 mice including 3 brain slices                       | % of AADC-expressing Cre-dependent mGFP (+) cells in the LHb | 93.8776 %                                                                                                                                   |
| Supplementary Fig. 4d    | n = 7, 7 mice                                             | Two-tailed unpaired <i>t</i> -test                           | <i>t</i> = -1.341<br>df = 12<br><i>p</i> = 0.205                                                                                            |
| Supplementary Fig. 4e    | n = 7, 7 mice                                             | Two-tailed unpaired <i>t</i> -test                           | <i>t</i> = -1.341<br>df = 12<br><i>p</i> = 0.205                                                                                            |
| Supplementary Fig. 6d    | n = 6, 6 mice including 6, 6 brain slices                 | Two-tailed unpaired <i>t</i> -test                           | <i>t</i> = -15.559<br>df = 5.243<br><i>p</i> = 0.000                                                                                        |
| Supplementary Fig. 7d    | n = 3, 3 HEK293T cell lysates                             | Two-tailed unpaired <i>t</i> -test                           | <i>t</i> = 3.723<br>df = 4<br><i>p</i> = 0.020                                                                                              |
| Supplementary Fig. 7f    | n = 5, 6 mice including 5, 6 brain slices                 | Two-tailed unpaired <i>t</i> -test                           | <i>t</i> = 12.191<br>df = 9<br><i>p</i> = 0.000                                                                                             |
| Supplementary Fig. 8a    | n = 11, 11 mice                                           | Two-tailed unpaired <i>t</i> -test                           | <i>t</i> = 1.799<br>df = 20<br><i>p</i> = 0.087                                                                                             |
| Supplementary Fig. 8b    | n = 11, 11 mice                                           | Two-tailed unpaired <i>t</i> -test                           | <i>t</i> = 2.064<br>df = 20<br><i>p</i> = 0.052                                                                                             |
| Supplementary Fig. 8c    | n = 11, 11 mice                                           | Two-tailed unpaired <i>t</i> -test                           | <i>t</i> = 0.400<br>df = 20<br><i>p</i> = 0.693                                                                                             |
| Supplementary Fig. 8d    | n = 11, 11 mice                                           | Two-tailed unpaired <i>t</i> -test                           | <i>t</i> = 0.905<br>df = 20<br><i>p</i> = 0.376                                                                                             |

|                        |                                           |                                                                                           |                                        |
|------------------------|-------------------------------------------|-------------------------------------------------------------------------------------------|----------------------------------------|
| Supplementary Fig. 8e  | n = 11, 11 mice                           | Two-tailed unpaired <i>t</i> -test                                                        | t = 0.348<br>df = 20<br>p = 0.731      |
| Supplementary Fig. 8f  | n = 11, 11 mice                           | Two-tailed unpaired <i>t</i> -test                                                        | t = -0.219<br>df = 14.983<br>p = 0.830 |
| Supplementary Fig. 10e | n = 14, 14 mice                           | Two-tailed unpaired <i>t</i> -test                                                        | t = 4.909<br>df = 20.465<br>p = 0.000  |
| Supplementary Fig. 10f | n = 14, 14 mice                           | Two-tailed unpaired <i>t</i> -test                                                        | t = -2.090<br>df = 26<br>p = 0.047     |
| Supplementary Fig. 10g | n = 14, 14 mice                           | Two-tailed unpaired <i>t</i> -test                                                        | t = -0.411<br>df = 26<br>p = 0.684     |
| Supplementary Fig. 10h | n = 14, 14 mice                           | Two-tailed unpaired <i>t</i> -test                                                        | t = -0.108<br>df = 26<br>p = 0.915     |
| Supplementary Fig. 10i | n = 14, 14 mice                           | Two-tailed unpaired <i>t</i> -test                                                        | t = -0.829<br>df = 26<br>p = 0.415     |
| Supplementary Fig. 10j | n = 14, 14 mice                           | Two-tailed unpaired <i>t</i> -test                                                        | t = -1.881<br>df = 26<br>p = 0.071     |
| Supplementary Fig. 10k | n = 14, 14 mice                           | Two-tailed unpaired <i>t</i> -test                                                        | t = -1.255<br>df = 26<br>p = 0.221     |
| Supplementary Fig. 10l | n = 14, 14 mice                           | Two-tailed unpaired <i>t</i> -test                                                        | t = -1.268<br>df = 26<br>p = 0.216     |
| Supplementary Fig. 10m | n = 14, 14 mice                           | Two-tailed unpaired <i>t</i> -test                                                        | t = -1.149<br>df = 26<br>p = 0.261     |
| Supplementary Fig. 11c | n = 8, 8 mice including 8, 8 brain slices | Two-tailed unpaired <i>t</i> -test                                                        | t = 6.243<br>df = 8.795<br>p = 0.000   |
| Supplementary Fig. 11d | n = 8, 8 mice including 8, 8 brain slices | Two-tailed unpaired <i>t</i> -test                                                        | t = -4.536<br>df = 8.678<br>p = 0.002  |
| Supplementary Fig. 12b | n = 10 cells from 4 mice                  | Repeated measure One-way ANOVA followed by contrast test (Between Baseline and Light ON)  | F = 44.054<br>p = 0.000                |
|                        |                                           | Repeated measure One-way ANOVA followed by contrast test (Between Light ON and Light OFF) | F = 5.924<br>p = 0.038                 |
| Supplementary Fig. 12c | n = 13 cells from 4 mice                  | Repeated measure One-way ANOVA followed by contrast test (Between Baseline and Light ON)  | F = 0.035<br>p = 0.855                 |
|                        |                                           | Repeated measure One-way ANOVA followed by contrast test (Between Light ON and Light OFF) | F = 1.582<br>p = 0.232                 |
| Supplementary Fig. 12e | n = 11 cells from 5 mice                  | Repeated measure One-way ANOVA followed by contrast test (Between Baseline and RO5263397) | F = 25.864<br>p = 0.000                |

|                            |                                                        |                                                                                                   |                                                                                                                                            |
|----------------------------|--------------------------------------------------------|---------------------------------------------------------------------------------------------------|--------------------------------------------------------------------------------------------------------------------------------------------|
|                            |                                                        | Repeated measure One-way ANOVA followed by contrast test<br>(Between RO5263397 and EPPTB)         | F = 23.844<br><i>p</i> = 0.000                                                                                                             |
| Supplementary Fig. 12f     | n = 21 cells from 8 mice                               | Repeated measure One-way ANOVA followed by contrast test<br>(Between Baseline and RO5263397)      | F = 11.887<br><i>p</i> = 0.003                                                                                                             |
|                            |                                                        | Repeated measure One-way ANOVA followed by contrast test<br>(Between RO5263397 and EPPTB)         | F = 7.397<br><i>p</i> = 0.013                                                                                                              |
| Supplementary Fig. 13e (T) | n = 4 mice including 4 brain slices                    | % of GAD2-expressing GAD1 (+) cells in the RMTg                                                   | 97.0213 %                                                                                                                                  |
| Supplementary Fig. 13e (M) | n = 3 mice including 3 brain slices                    | % of VGLUT2-expressing GAD1 (+) cells in the RMTg                                                 | 0.8984 %                                                                                                                                   |
| Supplementary Fig. 13e (B) | n = 3 mice including 3 brain slices                    | % of VGLUT3-expressing GAD1 (+) cells in the RMTg                                                 | 0.3057 %                                                                                                                                   |
| Supplementary Fig. 13g     | n = 3 mice including 3 brain slices                    | % of TAAR1-expressing AADC (+) cells in the LHb                                                   | 0.1608 %                                                                                                                                   |
| Supplementary Fig. 14b     | n = 5, 5 mice including 8, 10 brain slices             | Two-tailed unpaired <i>t</i> -test                                                                | <i>t</i> = -2.183<br>df = 8<br><i>p</i> = 0.061                                                                                            |
| Supplementary Fig. 14d     | n = 5, 5, 5, 5 mice including 9, 7, 9, 10 brain slices | One-way ANOVA                                                                                     | F = 0.218<br><i>p</i> = 0.883<br>Tukey HSD<br>Naïve vs TS <i>p</i> = 0.992<br>Naïve vs FS <i>p</i> = 1.000<br>Naïve vs RS <i>p</i> = 0.958 |
| Supplementary Fig. 14f     | n = 5, 5 mice including 8, 8 brain slices              | Two-tailed unpaired <i>t</i> -test                                                                | <i>t</i> = 0.385<br>df = 8<br><i>p</i> = 0.710                                                                                             |
| Supplementary Fig. 15d     | n = 10 cells from 6 mice                               | Repeated measure One-way ANOVA followed by contrast test<br>(Between Baseline and Light-ON)       | F = 22.864<br><i>p</i> = 0.000                                                                                                             |
|                            |                                                        | Repeated measure One-way ANOVA followed by contrast test<br>(Between Light-ON and Light-ON+EPPTB) | F = 25.705<br><i>p</i> = 0.000                                                                                                             |
| Supplementary Fig. 15e     | n = 10 cells from 6 mice                               | Repeated measure One-way ANOVA followed by contrast test<br>(Between Baseline and Light-ON)       | F = 11.795<br><i>p</i> = 0.007                                                                                                             |
|                            |                                                        | Repeated measure One-way ANOVA followed by contrast test<br>(Between Light-ON and Light-ON+EPPTB) | F = 20.214<br><i>p</i> = 0.001                                                                                                             |
| Supplementary Fig. 15h     | n = 14 cells from 7 mice                               | Repeated measure One-way ANOVA followed by contrast test<br>(Between Baseline and EPPTB)          | F = 10.518<br><i>p</i> = 0.006                                                                                                             |
|                            |                                                        | Repeated measure One-way ANOVA followed by contrast test<br>(Between EPPTB and EPPTB+Light-ON)    | F = 3.177<br><i>p</i> = 0.098                                                                                                              |
| Supplementary Fig. 15i     | n = 14 cells from 7 mice                               | Repeated measure One-way ANOVA followed by contrast test<br>(Between Baseline and EPPTB)          | F = 7.702<br><i>p</i> = 0.016                                                                                                              |

|                        |                                 |                                                                                                |                                        |
|------------------------|---------------------------------|------------------------------------------------------------------------------------------------|----------------------------------------|
|                        |                                 | Repeated measure One-way ANOVA followed by contrast test<br>(Between EPPTB and EPPTB+Light-ON) | F = 0.526<br>p = 0.481                 |
| Supplementary Fig. 16b | n = 12, 20 mice                 | Two-tailed unpaired <i>t</i> -test                                                             | t = -2.368<br>df = 17.066<br>p = 0.030 |
| Supplementary Fig. 17b | n = 34, 103 cells from 2 mice   | Two-tailed unpaired <i>t</i> -test                                                             | t = 18.678<br>df = 99.322<br>p = 0.000 |
| Supplementary Fig. 17e | n = 29, 53 cells from 2 mice    | Two-tailed unpaired <i>t</i> -test                                                             | t = 16.290<br>df = 78.307<br>p = 0.000 |
| Supplementary Fig. 17g | n = 34, 29 cells from 2, 2 mice | Two-tailed unpaired <i>t</i> -test                                                             | t = -4.863<br>df = 43.389<br>p = 0.000 |

173 (L), left panel; (R), right panel; (M) middle panel; (T), top panel; (B), bottom panel
