# Supplementary material for: Neural mechanism of acute stress regulation by trace aminergic signalling in the lateral habenula in male mice
Source: PubMed Central journal article supplement (PMC10140019; doi:10.1038/s41467-023-38180-7), 2023-04-27
Supplement: 41467_2023_38180_MOESM3_ESM.pdf [file 41467_2023_38180_MOESM3_ESM.pdf]

## **Description of Additional Supplementary Files**

File Name: Supplementary Movie 1

Description: Anterograde tracing of habenula D-neurons
